# Supplementary material for: Overexpression of wild type RRAS2, without oncogenic mutations, drives chronic lymphocytic leukemia
Source: Mol Cancer. 2022 Feb 4;21:35. doi: 10.1186/s12943-022-01496-x (PMC8815240; doi:10.1186/s12943-022-01496-x)
Supplement: Supplementary file 9 — Additional file 9. [file 12943_2022_1496_MOESM9_ESM.xlsx]

## Sheet: frequency of mutations
						follicular B cells from wild type C57BL/6 mice						CD19+CD5+ B cells from Rosa26-RRAS2 x mb1-Cre mice					CD19+GFPlow cells	CD19+GFPhigh cells
																	Rosa26-RRAS2 x mb1-Cre mice
Chromosome 1	Position	Gene	Type	AAChange	NTChange	sample_01	sample_02	sample_03	sample_04	sample_05	sample_06	sample_09	sample_10	sample_11	sample_13	sample_14	sample_16	sample_17
1	85248349	C130026I21Rik	missense_variant	N/I	aAt/aTt	0	0	0	0	0	0	0.5	0.5	0.5	0.5	0.5	0.5	0.5
1	85248361	C130026I21Rik	missense_variant	P/L	cCg/cTg	0	0	0	0	0	0	0.5	0.5	0	0.5	0.5	0.5	0.5
1	85601188	Sp140	missense_variant	S/I	aGc/aTc	0	0	0	0	0	0	0.5	0.5	0.5	0	0.5	0.5	0.5
1	85642618	Sp140	missense_variant	Q/K	Cag/Aag	0	0	0	0	0	0	1	0.5	0	0.5	0.5	0.5	0.5
Chromosome 2	Position	Gene	Type	AAChange	NTChange	sample_01	sample_02	sample_03	sample_04	sample_05	sample_06	sample_09	sample_10	sample_11	sample_13	sample_14	sample_16	sample_17
2	98662303	Gm10801	missense_variant	R/G	Aga/Gga	1	1	1	1	1	0	0	0	0	0	0	0	1
Chromosome 3	Position	Gene	Type	AAChange	NTChange	sample_01	sample_02	sample_03	sample_04	sample_05	sample_06	sample_09	sample_10	sample_11	sample_13	sample_14	sample_16	sample_17
3	115946710	Slc30a7	missense_variant&splice_region_variant	A/V	gCt/gTt	0	0	0	1	0	0	1	0	1	1	1	1	1
3	115954179	Slc30a7	missense_variant	Y/F	tAc/tTc	0	0	0	1	0	0	1	1	1	1	1	1	1
3	116618881	Sass6	missense_variant	F/S	tTt/tCt	0	0	0	1	0	0	1	1	1	0	1	1	1
3	121320145	Alg14	missense_variant	R/C	Cgt/Tgt	0	0	0	1	0	0	1	1	1	1	1	1	1
3	127583727	Zgrf1	missense_variant	A/S	Gcg/Tcg	0	0	0	0	0	0	1	1	0	1	1	1	1
3	127583730	Zgrf1	missense_variant	R/G	Cga/Gga	0	0	0	0	0	0	1	1	0	1	1	1	1
3	127615518	Zgrf1	missense_variant	V/I	Gta/Ata	0	0	0	1	0	0	0	1	1	1	1	1	1
3	129878749	Pla2g12a	missense_variant	S/G	Agc/Ggc	0	0	0	0.5	0	0	1	1	1	1	1	1	1
3	133082277	Gstcd	missense_variant	S/N	aGc/aAc	0	0	0	0	0	0	0	1	1	1	1	1	1
3	133469374	Tet2	missense_variant	R/H	cGt/cAt	0	0	0	0	0	0	1	1	1	1	1	1	1
3	138147422	Trmt10a	missense_variant	T/P	Act/Cct	0	0	0	1	0	0	1	1	1	1	1	1	1
3	142277907	Pdlim5	missense_variant	S/A	Tcg/Gcg	0	0	0	0	0	0	1	1	1	1	1	1	1
3	152370376	Usp33	missense_variant	L/P	cTa/cCa	0	0	0	0	0	0.5	0.5	1	1	1	1	1	1
3	153938650	Acadm	missense_variant&NMD_transcript_variant	P/S	Cct/Tct	0	0	0	0	0	0	0.5	1	1	1	1	1	1
Chromosome 4	Position	Gene	Type	AAChange	NTChange	sample_01	sample_02	sample_03	sample_04	sample_05	sample_06	sample_09	sample_10	sample_11	sample_13	sample_14	sample_16	sample_17
4	21873684	Pnisr	missense_variant	R/G	Cgt/Ggt	0	0	0	0	0	0	1	1	1	1	1	1	1
4	108626149	Cc2d1b	missense_variant	G/A	gGg/gCg	0	0	0	0	0	0	1	1	1	0.5	0	0.5	1
4	118162542	Kdm4a	missense_variant	M/T	aTg/aCg	0	0	0	0	0	0	1	1	1	0.5	0	0.5	1
4	118361683	Hyi	missense_variant	T/A	Acg/Gcg	0	0	0	0	0	0	1	1	1	0.5	0	0.5	1
4	118361912	Hyi	missense_variant	E/A	gAa/gCa	0	0	0	0	0	0	1	1	1	0.5	0	0.5	1
4	118362051	Hyi	missense_variant	F/S	tTt/tCt	0	0	0	0	0	0	1	1	1	0.5	0	0.5	1
4	118362394	Hyi	missense_variant	A/V	gCg/gTg	0	0	0	0	0	0	1	1	1	0.5	0	0.5	1
4	118362404	Hyi	missense_variant	G/S	Ggc/Agc	0	0	0	0	0	0	1	1	1	0.5	0	0.5	1
4	118362409	Hyi	missense_variant	A/V	gCt/gTt	0	0	0	0	0	0	1	1	1	0.5	0	0.5	1
4	118387641	Szt2	missense_variant	S/P	Tca/Cca	0	0	0	0	0	0	1	1	1	0.5	0	0.5	1
4	118621362	Ebna1bp2	missense_variant&splice_region_variant	S/N	aGt/aAt	0	0	0	0	0	0	1	1	1	0.5	0	0.5	1
4	118621362	Ebna1bp2	missense_variant&splice_region_variant	S/N	aGt/aAt	0	0	0	0	0	0	1	1	1	0.5	0	0.5	1
4	120508090	Scmh1	missense_variant	K/R	aAa/aGa	0	0	0	0	0	0	1	1	1	1	0	0.5	1
4	120973167	Smap2	missense_variant	T/I	aCa/aTa	0	0	0	0	0	0	1	1	1	0.5	0	0.5	1
4	122864662	Cap1	missense_variant	S/P	Tct/Cct	0	0	0	0	0	0	1	1	1	0.5	0	0.5	1
4	123456691	Macf1	missense_variant	V/A	gTt/gCt	0	0	0	0	0	0	1	1	1	0.5	0	0.5	1
4	126180467	Thrap3	missense_variant	S/L	tCg/tTg	0	0	0	0	0	0	1	1	1	0.5	0	0.5	1
4	127120470	Zmym6	missense_variant	P/S	Ccc/Tcc	0	0	0	0	0	0	1	1	1	1	0	0.5	1
4	128592380	Zscan20	missense_variant	R/C	Cgt/Tgt	0	0	0	0	0	0	1	1	1	0	0.5	0.5	1
4	129180255	S100pbp	missense_variant	D/G	gAt/gGt	0	0	0	0	0	0	1	1	1	1	0.5	1	1
4	129182283	S100pbp	missense_variant	I/T	aTt/aCt	0	0	0	0	0	0	1	1	1	1	0.5	0.5	1
4	129200774	Yars	missense_variant&NMD_transcript_variant	T/M	aCg/aTg	0	0	0	0	0	0	1	1	1	1	0.5	0.5	1
4	129616471	Iqcc	stop_gained	W/*	tGg/tAg	0	0	0	0	0	0	0	1	1	1	0.5	0.5	1
4	129616642	Iqcc	missense_variant	L/S	tTa/tCa	0	0	0	0	0	0	1	1	1	0	0.5	0.5	1
4	129616648	Iqcc	missense_variant	N/S	aAt/aGt	0	0	0	0	0	0	1	1	1	0	0.5	0.5	1
4	129617753	Iqcc	missense_variant	D/G	gAt/gGt	0	0	0	0	0	0	1	1	1	1	0.5	0.5	1
4	129617801	Iqcc	missense_variant	Q/L	cAg/cTg	0	0	0	0	0	0	1	1	1	1	0.5	0.5	1
4	129622714	Ccdc28b	missense_variant	P/Q	cCa/cAa	0	0	0	0	0	0	1	1	1	1	0.5	0.5	1
4	132321686	Trnau1ap	missense_variant	V/M	Gtg/Atg	0	0	0	0	0	0	1	1	1	1	0.5	0.5	1
4	132377246	Phactr4	missense_variant	A/T	Gcc/Acc	0	0	0	0	0	0	0	1	1	1	1	1	1
4	133063764	Ahdc1	missense_variant	G/A	gGc/gCc	0	0	0	0	0	0	1	0	1	1	0.5	0.5	1
4	133257808	Sytl1	missense_variant	F/S	tTc/tCc	0	0	0	0	0	0	1	1	1	1	1	0.5	1
4	133323841	Wdtc1	missense_variant	R/H	cGt/cAt	0	0	0	0	0	0	1	1	1	1	0.5	1	1
4	133370607	Slc9a1	missense_variant	V/M	Gtg/Atg	0	0	0	0	0	0	1	1	1	1	0.5	1	1
4	133579796	Gpatch3	missense_variant	R/Q	cGg/cAg	0	0	0	0	0	0	0	1	1	1	0.5	0.5	1
4	133579855	Gpatch3	missense_variant	T/A	Act/Gct	0	0	0	0	0	0	1	1	1	1	1	0.5	1
4	133582561	Gpatch3	missense_variant	G/R	Ggc/Cgc	0	0	0	0	0	0	1	1	1	1	0.5	0.5	1
4	133586018	Gpn2	missense_variant	I/V	Atc/Gtc	0	0	0	0	0	0	1	1	1	1	0.5	0.5	1
4	133588599	Gpn2	missense_variant	E/G	gAg/gGg	0	0	0	0	0	0	1	1	1	1	0.5	0.5	1
4	133591394	Gpn2	missense_variant	L/P	cTg/cCg	0	0	0	0	0	0	1	1	1	1	0.5	0.5	1
4	133662603	Pigv	missense_variant	R/S	agA/agC	0	0	0	0	0	0	1	1	1	1	1	0.5	1
4	133662665	Pigv	missense_variant	S/P	Tcc/Ccc	0	0	0	0	0	0	1	1	1	1	0.5	0.5	1
4	133681787	Arid1a	missense_variant	N/S	aAt/aGt	0	0	0	0	0	0	1	1	1	1	0.5	0.5	1
4	133681919	Arid1a	missense_variant	Y/S	tAt/tCt	0	0	0	0	0	0	1	1	1	1	0.5	0.5	1
4	133720621	Arid1a	missense_variant	A/S	Gca/Tca	0	0	0	0	0	0	1	1	1	1	0.5	0.5	1
4	133752826	Arid1a	frameshift_variant	SS/SX	tCCTCG/tCGT	0	0	0	0	0	0	0.5	1	1	1	0.5	0.5	0.5
4	133753350	Arid1a	missense_variant	S/G	Agc/Ggc	0	0	0	0	0	0	1	1	1	1	0.5	0.5	1
4	134245364	Zfp593	missense_variant	P/R	cCg/cGg	0	0	0	0	0	0	1	1	1	1	0	0.5	1
4	134529190	Mtfr1l	missense_variant&NMD_transcript_variant	H/R	cAt/cGt	0	0	0	0	0	0	1	1	1	1	1	0.5	1
4	134529226	Mtfr1l	missense_variant&NMD_transcript_variant	S/N	aGt/aAt	0	0	0	0	0	0	1	1	1	1	0.5	0.5	1
4	134563731	Man1c1	missense_variant	F/Y	tTt/tAt	0	0	0	0	0	0	1	0	1	1	1	0.5	1
4	135322313	Srrm1	missense_variant	A/T	Gca/Aca	0	0	0	0	0	0	1	1	1	1	0.5	0.5	1
4	135323927	Srrm1	missense_variant	L/P	cTg/cCg	0	0	0	0	0	0	1	1	1	1	0.5	0.5	1
4	135452438	Nipal3	missense_variant	E/K	Gag/Aag	0	0	0	0	0	0	1	1	1	1	0.5	0	1
4	135872315	Pnrc2	missense_variant	H/L	cAt/cTt	0	0	0	0	0	0	1	1	1	1	0.5	0.5	1
4	135917427	Cnr2	missense_variant	T/M	aCg/aTg	0	0	0	0	0	0	1	1	1	1	0.5	0.5	1
4	135917607	Cnr2	missense_variant	G/A	gGc/gCc	0	0	0	0	0	0	1	1	1	1	0.5	0.5	1
4	135933025	Fuca1	missense_variant	M/V	Atg/Gtg	0	0	0	0	0	0	1	1	1	1	0.5	0.5	1
4	135934864	Fuca1	missense_variant	N/D	Aac/Gac	0	0	0	0	0	0	1	1	1	1	0.5	0.5	1
4	135936930	Fuca1	missense_variant	T/S	Act/Tct	0	0	0	0	0	0	1	1	1	1	0.5	0.5	1
4	135970889	Lypla2	missense_variant	V/L	Gtg/Ctg	0	0	0	0	0	0	1	1	1	1	0.5	0.5	1
4	136014429	Eloa	missense_variant	I/V	Atc/Gtc	0	0	0	0	0	0	0	1	1	1	0.5	0.5	1
4	136192774	E2f2	missense_variant	I/V	Ata/Gta	0	0	0	0	0	0	0	1	1	1	0.5	0.5	1
4	140993841	Atp13a2	missense_variant	V/L	Gtt/Ctt	0	0	0	0	0	0	1	1	1	1	0.5	1	1
4	140995339	Atp13a2	missense_variant	G/S	Ggt/Agt	0	0	0	0	0	0	1	1	1	1	0.5	1	1
4	141000569	Atp13a2	missense_variant	I/V	Atc/Gtc	0	0	0	0	0	0	1	1	1	1	0.5	1	1
4	141000799	Atp13a2	missense_variant	T/A	Aca/Gca	0	0	0	0	0	0	1	1	1	1	0.5	1	1
4	141001971	Atp13a2	missense_variant	C/R	Tgc/Cgc	0	0	0	0	0	0	1	1	1	1	0.5	1	1
4	141002998	Atp13a2	missense_variant	A/E	gCg/gAg	0	0	0	0	0	0	1	1	1	1	0.5	1	1
4	141004216	Atp13a2	missense_variant	S/F	tCc/tTc	0	0	0	0	0	0	1	1	1	1	0.5	1	1
4	141068223	Necap2	missense_variant	I/L	Atc/Ctc	0	0	0	0	0	0	1	1	1	1	0.5	1	1
4	141199963	Fbxo42	missense_variant	I/T	aTa/aCa	0	0	0	0	1	0	1	0	1	1	0.5	1	1
4	141200214	Fbxo42	missense_variant	S/P	Tcc/Ccc	0	0	0	0	0	0	0	1	1	1	0.5	1	1
4	141200227	Fbxo42	missense_variant	P/Q	cCa/cAa	0	0	0	0	0	0	0	1	1	1	0.5	1	1
4	141470370	Spen	missense_variant	A/T	Gct/Act	0	0	0	0	0	0	1	1	1	1	0.5	1	1
4	141472289	Spen	missense_variant	L/P	cTg/cCg	0	0	0	0	0	0	1	1	1	1	0.5	1	1
4	141475118	Spen	missense_variant	N/S	aAc/aGc	0	0	0	0	0	0	1	1	1	1	0.5	1	1
4	141476337	Spen	missense_variant	V/I	Gtc/Atc	0	0	0	0	0	0	1	0	1	1	0.5	1	1
4	141476505	Spen	missense_variant	M/L	Atg/Ctg	0	0	0	0	0	0	0	1	1	1	0.5	1	1
4	141476571	Spen	missense_variant	S/P	Tct/Cct	0	0	0	0	0	0	1	1	1	1	0.5	1	1
4	141476592	Spen	missense_variant	G/R	Ggg/Agg	0	0	0	0	0	0	1	1	1	1	0	1	1
4	141478524	Spen	missense_variant	T/A	Acc/Gcc	0	0	0	0	0	0	1	1	1	1	0.5	1	1
4	143135722	Prdm2	missense_variant	A/T	Gcc/Acc	0	0	0	0	0	0	1	1	1	1	0.5	1	1
4	143142199	Prdm2	missense_variant	V/I	Gtc/Atc	0	0	0	0	0	0	1	0	1	1	0.5	1	1
4	144893593	Dhrs3	missense_variant&NMD_transcript_variant	M/L	Atg/Ctg	0	0	0	0	0	0	1	1	1	1	1	1	1
4	144918651	Dhrs3	missense_variant&splice_region_variant&NMD_transcript_variant	I/L	Att/Ctt	0	0	0	0	0	0	1	1	1	1	1	1	1
4	144983359	Vps13d	missense_variant&NMD_transcript_variant	R/K	aGg/aAg	0	0	0	0	0	0	1	1	1	1	0.5	1	1
4	145110898	Vps13d	missense_variant	V/M	Gtg/Atg	0	0	0	0	0	0	1	1	1	1	0.5	1	1
4	145115487	Vps13d	missense_variant	R/G	Cga/Gga	0	0	0	0	0	0	1	1	1	1	0.5	1	1
4	145154643	Vps13d	missense_variant	L/P	cTg/cCg	0	0	0	0	0	0	1	1	1	1	0	1	1
4	145168154	Vps13d	missense_variant	A/V	gCg/gTg	0	0	0	0	0	0	1	1	1	1	0	1	1
4	145168161	Vps13d	missense_variant	L/V	Ctg/Gtg	0	0	0	0	0	0	1	1	1	1	0	1	1
4	145215905	Tnfrsf1b	missense_variant	C/Y	tGt/tAt	0	0	0	0	0	0	1	1	1	1	0.5	1	1
4	145215920	Tnfrsf1b	missense_variant	P/L	cCg/cTg	0	0	0	0	0	0	1	1	1	1	0.5	1	1
4	145219761	Tnfrsf1b	missense_variant	F/S	tTt/tCt	0	0	0	0	0	0	1	1	1	1	0.5	1	1
4	145223524	Tnfrsf1b	missense_variant	I/F	Atc/Ttc	0	0	0	0	0	0	1	1	1	1	0.5	1	1
4	145225470	Tnfrsf1b	missense_variant	I/T	aTc/aCc	0	0	0	0	0	0	1	1	1	1	0	1	1
4	145227473	Tnfrsf1b	missense_variant	T/S	aCc/aGc	0	0	0	0	0	0	1	1	1	0	0.5	1	1
4	145534892	Zfp990	missense_variant	R/T	aGa/aCa	0	0	0	0	0	0	0	1	1	1	1	1	1
4	145536860	Zfp990	missense_variant	I/L	Att/Ctt	0	0	0	0	0	0	1	0.5	1	0.5	0.5	0.5	0.5
4	145536946	Zfp990	missense_variant	K/N	aaA/aaT	0	0	0	0	0	0	1	1	1	1	1	1	1
4	145537158	Zfp990	missense_variant	C/Y	tGt/tAt	0	0	0	0	0	0	1	0	1	1	1	1	1
4	145537188	Zfp990	missense_variant	K/I	aAa/aTa	0	0	0	0	0	0	1	1	1	1	1	1	1
4	145537428	Zfp990	missense_variant	S/C	tCc/tGc	1	0	0	0	0	0	1	1	1	1	1	1	1
4	145537772	Zfp990	missense_variant	H/D	Cac/Gac	0	0	0	0	0	0	1	1	0.5	1	1	1	1
4	145537779	Zfp990	missense_variant	C/S	tGc/tCc	0	0	0	0	0	0	1	1	1	1	1	1	1
4	145537940	Zfp990	missense_variant	Q/K	Caa/Aaa	0	0	0	0	0	0	0.5	0.5	0.5	0.5	0.5	0.5	0.5
4	145537946	Zfp990	missense_variant	S/C	Agc/Tgc	0	0	0	0	0	0	0.5	0.5	0	0.5	0.5	0.5	0.5
4	145537949	Zfp990	missense_variant	S/G	Agt/Ggt	0	0	0	0	0	0	0.5	0.5	0.5	0.5	0.5	0.5	0.5
4	145538031	Zfp990	missense_variant	G/D	gGc/gAc	0	0	0	0	1	0	0.5	0.5	0.5	0.5	0.5	0.5	0.5
4	145538117	Zfp990	missense_variant	Y/H	Tat/Cat	0	0	0	0	0	0	1	1	1	1	1	1	1
4	146893802	Gm21411	missense_variant	R/K	aGg/aAg	0	0	0	0	0	0	1	1	1	1	0.5	1	1
4	147507621	Zfp982	missense_variant	F/S	tTt/tCt	0	0	0	0	0	0	0	1	1	1	1	1	1
4	147512369	Zfp982	missense_variant	C/Y	tGt/tAt	0	0	0	0	0	0	1	1	1	1	1	1	1
4	147860963	Miip	missense_variant	Q/H	caA/caT	0	0	0	0	0	0	1	1	1	1	0.5	1	1
4	147860995	Miip	missense_variant	A/T	Gcc/Acc	0	0	0	0	0	0	1	1	1	1	0.5	1	1
4	147862304	Miip	missense_variant	Q/R	cAg/cGg	0	0	0	0	0	0	1	1	1	1	0.5	1	1
4	147865860	Miip	missense_variant	V/G	gTc/gGc	0	0	0	0	0	0	1	1	1	1	0.5	1	1
4	147865887	Miip	missense_variant	D/G	gAt/gGt	0	0	0	0	0	0	1	1	1	1	0.5	1	1
4	147865896	Miip	missense_variant	S/I	aGt/aTt	0	0	0	0	0	0	1	0	1	1	0.5	1	1
4	147885688	Mfn2	missense_variant	Q/R	cAg/cGg	0	0	0	0	0	0	1	1	1	1	0.5	1	1
4	148149408	Fbxo6	missense_variant	R/K	aGg/aAg	0	0	0	0	0	0	1	1	1	1	0.5	1	1
4	148580410	Exosc10	missense_variant	I/V	Ata/Gta	0	0	0	0	0	0	1	1	1	1	0.5	1	1
4	148581780	Exosc10	missense_variant	C/F	tGt/tTt	0	0	0	0	0	0	1	1	1	1	0.5	1	1
4	148614261	Masp2	missense_variant	A/T	Gcc/Acc	0	0	0	0	0	0	0	1	1	1	0.5	1	1
4	149106299	Dffa	missense_variant	I/T	aTt/aCt	0	0	0	0	0	0	1	0	0.5	1	1	0.5	1
4	149128877	Cenps	missense_variant	G/R	Gga/Cga	0	0	0	0	0	0	1	0	0.5	1	1	0.5	1
4	149360571	Ube4b	missense_variant&NMD_transcript_variant	L/P	cTt/cCt	0	0	0	0	0	0	1	1	0	1	0.5	0.5	1
4	149488070	Lzic	missense_variant	A/V	gCg/gTg	0	0	0	0	0	0	1	0	0.5	1	0.5	0.5	1
4	149996133	H6pd	missense_variant	V/A	gTc/gCc	0	0	0	0	0	0	1	0.5	0.5	0	1	0.5	1
4	150614978	Rere	missense_variant	S/G	Agt/Ggt	0	0	0	0	0	0	1	1	0.5	0.5	0.5	0.5	1
4	151985713	Thap3	missense_variant	H/Y	Cac/Tac	0	0	0	0	0	0	1	0.5	0.5	0.5	0.5	0.5	1
4	152025829	Zbtb48	missense_variant	P/L	cCc/cTc	0	0	0	0	0	0	1	1	1	1	0.5	0.5	1
4	152353637	Chd5	missense_variant	K/E	Aaa/Gaa	1	1	1	1	1	1	0	0	0	0	0	0	0
4	152353640	Chd5	missense_variant	L/M	Ctg/Atg	1	1	1	1	1	1	0	0	0	0	0	0	0
4	152353641	Chd5	missense_variant	L/Q	cTg/cAg	1	1	1	1	1	1	0	0	0	0	0	0	0
Chromosome 5	Position	Gene	Type	AAChange	NTChange	sample_01	sample_02	sample_03	sample_04	sample_05	sample_06	sample_09	sample_10	sample_11	sample_13	sample_14	sample_16	sample_17
5	36820971	Man2b2	missense_variant	A/D	gCc/gAc	0	0	0	0	1	0	1	0	1	1	1	0.5	1
5	96758142	Fras1	missense_variant	L/P	cTg/cCg	0	0	0	0	0	0	1	1	1	1	1	1	1
5	147548261	Pan3	missense_variant	S/C	Agt/Tgt	0	0	0	0	0	0	0.5	0.5	0.5	1	1	1	0
Chromosome 7	Position	Gene	Type	AAChange	NTChange	sample_01	sample_02	sample_03	sample_04	sample_05	sample_06	sample_09	sample_10	sample_11	sample_13	sample_14	sample_16	sample_17
7	19004452	Irf2bp1	missense_variant	A/S	Gcg/Tcg	0	0	0	0	0	0	0.5	0	0.5	0.5	0.5	0.5	0.5
7	19357913	Cd3eap	missense_variant	R/G	Cga/Gga	0	0	0	1	0	0	1	0	1	1	1	1	1
7	19856277	Ceacam16	missense_variant	M/T	aTg/aCg	0	0	0	1	0	0	1	1	0.5	0.5	0.5	0.5	0.5
7	24531828	Irgq	missense_variant	P/L	cCg/cTg	0	0	0	0	0	1	1	1	1	1	1	1	1
7	27243365	Coq8b	missense_variant	C/R	Tgc/Cgc	0	0	0	0	0	0	1	1	1	1	1	1	1
7	27342695	Shkbp1	missense_variant	S/A	Tcc/Gcc	0	0	0	0	0	0	0	0.5	0.5	0.5	0.5	0.5	0.5
7	28174509	Fbl	missense_variant	S/R	Agc/Cgc	0	0	0	0	0	0	0	0.5	0.5	1	0.5	0.5	0.5
7	28174509	Fbl	missense_variant	S/R	Agc/Cgc	0	0	0	0	0	0	0	0.5	0.5	1	0.5	0.5	0.5
7	28362935	Plekhg2	missense_variant	P/L	cCt/cTt	0	0	0	0	0	0	1	1	0	1	0.5	0.5	0.5
7	29153458	Fam98c	missense_variant	S/F	tCc/tTc	0	0	0	0.5	0	0	1	0	1	0.5	0.5	0.5	0.5
7	29155767	Fam98c	missense_variant	W/L	tGg/tTg	0	0	0	0.5	0	0	1	0.5	0.5	0	0.5	0.5	0.5
7	29180320	Psmd8	missense_variant	N/S	aAc/aGc	0	0	0	0.5	0	0	1	0.5	0.5	0.5	0.5	0.5	0.5
7	29180383	Psmd8	missense_variant	V/G	gTc/gGc	0	0	0	0.5	0	0	1	0.5	0.5	0.5	0.5	0.5	0.5
7	29829833	Zfp790	missense_variant	A/T	Gcc/Acc	0	0	0	0	0	0	1	1	0	0.5	1	0.5	0.5
7	29845979	Zfp940	missense_variant	T/A	Act/Gct	0	0	0	0	0	0	1	1	1	1	1	1	0.5
7	30105038	Zfp260	missense_variant	R/K	aGa/aAa	0	0	0	0	0	0	1	0	1	0.5	0.5	0.5	0.5
7	30574979	Kmt2b	missense_variant	Q/R	cAa/cGa	0	0	0	1	0	0	1	0.5	0.5	0.5	0.5	0.5	0.5
7	30590677	Zbtb32	missense_variant	T/S	aCc/aGc	0	0	0	0	1	0	1	1	0.5	0.5	0.5	0.5	0.5
7	30867053	Cd22	missense_variant	S/T	Tcg/Acg	0	0	0	0.5	0	0	1	0.5	0.5	0.5	0.5	0.5	0.5
7	30867466	Cd22	missense_variant	T/A	Act/Gct	0	0	0	0.5	0	0	1	0.5	0.5	0.5	0.5	0.5	0.5
7	30875867	Cd22	missense_variant	R/H	cGt/cAt	0	0	0	0.5	0	0	1	0.5	0.5	0.5	0.5	0.5	0.5
7	31035417	Fxyd5	splice_acceptor_variant			0	0	0	0	0	0	1	1	1	0.5	1	1	1
7	34205896	Gpi1	missense_variant	G/R	Ggg/Agg	0	0	0	0.5	0	0	1	0.5	0.5	0.5	0.5	0.5	0.5
7	34245760	4931406P16Rik	missense_variant	R/K	aGg/aAg	0	0	0	0	0	0	1	1	1	0	0.5	0.5	0.5
7	35297654	Gpatch1	missense_variant	R/Q	cGa/cAa	0	0	0	0	0	0	0	1	1	1	1	1	1
7	37965342	Uri1	missense_variant	E/D	gaA/gaT	0	0	0	0.5	0	0	1	0.5	0.5	1	1	0.5	1
7	37967400	Uri1	missense_variant	N/D	Aat/Gat	0	0	0	0.5	0	0	1	0.5	0.5	1	1	0.5	1
7	38267465	Pop4	missense_variant	L/P	cTa/cCa	0	0	0	1	0	0	1	0	0.5	1	1	0.5	1
7	44468161	Josd2	splice_donor_variant			0	0	0	0.5	0	0	1	0	1	0.5	1	0.5	0.5
7	44493269	Emc10	missense_variant	L/S	tTg/tCg	0	0	0	0.5	0	0	1	0.5	0.5	0.5	1	0.5	0.5
7	44529404	Spib	missense_variant	Y/F	tAc/tTc	0	0	0	0.5	0	0	1	0.5	0.5	0.5	1	0.5	0.5
7	44542220	Pold1	missense_variant	L/P	cTg/cCg	0	0	0	0.5	0	0	1	0	0.5	0.5	1	0.5	0.5
7	44828900	Nup62	missense_variant	G/V	gGc/gTc	0	0	0	0.5	0	0	1	0.5	0.5	1	1	0.5	0.5
7	44862368	Pnkp	missense_variant&splice_region_variant&NMD_transcript_variant	S/P	Tcg/Ccg	0	0	0	1	0	0	1	1	0	0.5	1	0.5	0.5
7	45001761	Irf3	missense_variant	M/V	Atg/Gtg	0	0	0	0.5	0	0	1	0.5	0.5	0.5	1	0.5	0.5
7	45007817	Scaf1	missense_variant	R/H	cGt/cAt	0	0	0	0.5	0	0	1	0.5	0.5	0.5	1	0.5	0.5
7	45008528	Scaf1	missense_variant	G/D	gGt/gAt	0	0	0	0.5	0	0	1	0	0.5	0.5	1	0.5	0.5
7	45713361	Sphk2	missense_variant	A/V	gCg/gTg	0	0	0	1	0	0	1	1	0	1	1	0.5	0.5
7	45827612	Grwd1	missense_variant	G/S	Ggt/Agt	0	0	0	0	0	0	1	0	1	1	1	0.5	0.5
7	45918097	Emp3	missense_variant	T/I	aCt/aTt	0	0	0	0.5	0	0	1	0.5	0.5	0.5	1	0.5	0.5
7	46054663	Nomo1	missense_variant	A/V	gCc/gTc	0	0	0	0	0	0	1	0	0.5	0.5	1	0.5	0.5
7	46081416	Nomo1	missense_variant	T/S	Acc/Tcc	0	0	0	0.5	0	0	1	0	0.5	0.5	1	0.5	0.5
7	46443281	Sergef	missense_variant	R/G	Aga/Gga	0	0	0	0.5	0	0	1	0.5	0.5	0.5	1	0.5	0.5
7	46443316	Sergef	missense_variant	D/A	gAc/gCc	0	0	0	0	0	0	1	1	0.5	1	1	0.5	0.5
7	56131292	Herc2	missense_variant	G/D	gGt/gAt	0	0	0	1	0	0	1	1	1	1	1	1	1
7	75608699	Akap13	missense_variant	S/L	tCa/tTa	0	0	0	0.5	0	0	1	1	1	1	1	1	1
7	75609559	Akap13	missense_variant	G/S	Ggc/Agc	0	0	0	0	0	0	1	1	1	1	1	1	1
7	75609956	Akap13	missense_variant	A/G	gCc/gGc	0	0	0	0	0	0	1	1	1	1	1	1	1
7	75610340	Akap13	missense_variant	V/G	gTt/gGt	0	0	0	1	0	0	1	1	1	1	1	1	1
7	75610883	Akap13	missense_variant	K/R	aAa/aGa	0	0	0	0.5	0	0	1	1	1	1	1	1	1
7	75610918	Akap13	missense_variant	I/V	Att/Gtt	0	0	0	0.5	0	0	1	0	1	1	1	1	1
7	75610934	Akap13	missense_variant	N/S	aAc/aGc	0	0	0	0.5	0	0	1	1	1	1	1	1	1
7	75611212	Akap13	missense_variant	I/V	Atc/Gtc	0	0	0	0	0	0	1	1	1	1	1	1	1
7	75611266	Akap13	missense_variant	P/S	Cct/Tct	0	0	0	1	0	0	1	1	1	1	1	1	1
7	75611539	Akap13	missense_variant	S/P	Tca/Cca	0	0	0	0.5	0	0	1	1	1	1	1	1	1
7	75666643	Akap13	missense_variant	P/S	Cca/Tca	0	0	0	0.5	0	0	1	1	1	1	1	1	1
7	75677247	Akap13	missense_variant	Q/K	Caa/Aaa	0	0	0	0	1	0	1	1	1	1	1	1	1
7	78902501	Aen	missense_variant	A/S	Gcg/Tcg	0	0	0	1	0	0	1	1	1	1	1	1	1
7	79452000	Polg	missense_variant	S/A	Tct/Gct	0	0	0	0.5	0	0	1	1	1	1	1	1	1
7	79456727	Polg	missense_variant	S/N	aGt/aAt	0	0	0	0	0	0	1	1	1	1	1	1	1
7	79460563	Polg	missense_variant	S/P	Tcc/Ccc	0	0	0	0.5	0	0	1	1	1	1	1	1	1
7	79465133	Polg	missense_variant	S/A	Tcc/Gcc	0	0	0	1	0	0	1	1	1	1	1	1	1
7	80223942	Sema4b	missense_variant	T/I	aCc/aTc	0	0	0	0	0	0	1	1	1	1	1	1	1
7	80238525	Gdpgp1	missense_variant	E/D	gaG/gaT	0	0	0	0	0	0	1	1	1	1	1	1	1
7	80320943	Rccd1	missense_variant	V/L	Gtg/Ttg	0	0	0	0	0	0	0	1	1	1	1	1	1
7	80331851	Unc45a	missense_variant&splice_region_variant	N/S	aAc/aGc	0	0	0	0	0	0	1	1	1	1	1	1	1
7	80351725	Man2a2	missense_variant	S/G	Agc/Ggc	0	0	0	0	0	0	1	1	1	1	1	1	1
7	80353012	Man2a2	missense_variant	S/A	Tct/Gct	0	0	0	0	0	0	1	1	1	1	1	1	1
7	80362627	Man2a2	missense_variant	R/Q	cGg/cAg	0	0	0	0	0	0	1	1	1	1	1	1	1
7	80362926	Man2a2	missense_variant	T/I	aCc/aTc	0	0	0	0	0	0	1	1	1	1	1	1	1
7	80362988	Man2a2	missense_variant&NMD_transcript_variant	G/S	Ggt/Agt	0	0	0	0	0	0	1	1	1	1	1	1	1
7	80595826	Crtc3	missense_variant&NMD_transcript_variant	R/H	cGc/cAc	0	0	0	0	0	0	0	1	1	1	1	1	1
7	81029509	Zfp592	missense_variant	I/V	Atc/Gtc	0	0	0	0	0	0	1	1	1	1	1	1	1
7	81586255	Whamm	missense_variant	T/I	aCa/aTa	0	0	0	0	0	0	1	1	1	1	1	1	1
7	81786157	3110040N11Rik	missense_variant	E/Q	Gag/Cag	0	0	0	0	0	0	1	1	1	1	1	1	1
7	81873792	Tm6sf1	missense_variant	L/V	Ttg/Gtg	0	0	0	0	1	0	1	1	1	1	1	1	1
7	82686706	Efl1	missense_variant	I/V	Atc/Gtc	0	0	0	0	0	0	1	1	1	0	1	1	1
7	82692869	Efl1	missense_variant	V/A	gTt/gCt	0	0	0	0	0	0	1	0	1	1	1	1	1
7	84588884	Fah	missense_variant	E/G	gAg/gGg	0	0	0	0	0	0	1	1	1	1	1	1	1
7	84633933	Zfand6	missense_variant	P/L	cCa/cTa	0	0	0	0	0	0	1	1	1	1	1	1	1
7	90444202	Crebzf	splice_donor_variant&NMD_transcript_variant			0	0	0	0	0	0	1	1	0.5	1	0.5	0.5	0.5
7	90468994	Tmem126b	missense_variant	L/P	cTt/cCt	0	0	0	0	0	0	1	0	1	1	1	1	1
7	90469007	Tmem126b	missense_variant	P/T	Cca/Aca	0	0	0	0	0	0	1	1	1	1	1	1	1
7	97453421	Kctd14	missense_variant	S/P	Tcc/Ccc	0	0	0	0	0	0	1	1	1	1	1	1	1
7	97457801	Kctd14	missense_variant	V/I	Gtt/Att	0	0	0	0	0	0	1	1	1	1	1	1	1
7	97661680	Rsf1	missense_variant	L/P	cTg/cCg	0	0	0	0	0	0	1	1	1	1	1	1	1
7	98979794	Uvrag	missense_variant	D/E	gaT/gaG	0	0	0	0	0	0	1	1	1	1	1	1	1
7	98988238	Uvrag	missense_variant	N/H	Aac/Cac	0	0	0	0	0	0	1	1	1	1	1	1	1
7	100418529	C2cd3	missense_variant	S/N	aGc/aAc	0	0	0	0	0	0	1	1	1	1	1	1	1
7	100539154	Coa4	missense_variant	L/M	Ctg/Atg	0	0	0	0	0	0	1	1	1	1	1	1	1
7	100552608	Mrpl48	missense_variant	I/V	Atc/Gtc	0	0	0	0	0	0	1	1	1	1	1	1	1
7	101373449	Arap1	missense_variant	P/S	Ccc/Tcc	0	0	0	0	0	0	1	1	1	1	1	1	1
7	101386233	Arap1	missense_variant	S/A	Tcg/Gcg	0	0	0	0	0	0	1	1	1	1	1	1	1
7	101998679	Numa1	missense_variant	A/V	gCt/gTt	0	0	0	0	0	0	1	1	1	1	1	1	1
7	102129885	Nup98	missense_variant	V/I	Gta/Ata	0	0	0	0	0	0	1	1	1	1	1	1	1
7	103812682	Hbb-bt	missense_variant	A/T	Gct/Act	0	0	0	0	0	0	1	1	0	1	1	1	1
7	103826691	Hbb-bs	missense_variant	A/T	Gct/Act	0	0	0	0	0	0	1	1	1	1	1	1	1
7	104340787	Trim12c	stop_gained	W/*	tgG/tgA	0	0	0	0	0	0	1	1	1	1	1	1	1
7	104347976	Trim12c	missense_variant	H/Q	caC/caA	0	0	0	0	0	0	1	1	1	1	1	1	1
7	104363619	Trim30b	missense_variant	G/V	gGg/gTg	0	0	0	0	0	0	1	1	1	0	1	1	1
7	104363706	Trim30b	missense_variant	W/S	tGg/tCg	0	0	0	0	0	0	0	1	1	1	1	1	1
7	104363785	Trim30b	missense_variant	T/A	Aca/Gca	0	0	0	0	0	0	1	1	0	1	1	1	1
7	104382403	Trim30c	missense_variant	C/R	Tgt/Cgt	0	0	0	0	0	0	1	1	1	1	1	1	1
7	104382948	Trim30c	missense_variant	R/Q	cGa/cAa	0	0	0	0	0	0	1	1	1	1	1	1	1
7	104383303	Trim30c	missense_variant	P/Q	cCa/cAa	0	0	0	0	0	0	0	1	1	1	1	1	1
7	104383304	Trim30c	missense_variant	P/T	Cca/Aca	0	0	0	0	0	0	0	1	1	1	1	1	1
7	104387529	Trim30c	missense_variant	K/N	aaA/aaC	0	0	0	0	0	0	1	1	1	1	1	1	1
7	104387554	Trim30c	missense_variant	N/S	aAt/aGt	0	0	0	0	0	0	1	1	0	1	1	1	1
7	104472261	Trim30d	missense_variant	H/Y	Cac/Tac	0	0	0	0	0	0	1	1	0	1	1	1	1
7	104472267	Trim30d	missense_variant	I/V	Atc/Gtc	0	0	0	0	0	0	1	1	0	1	1	1	1
7	104472270	Trim30d	missense_variant	S/P	Tct/Cct	0	0	0	0	0	0	1	1	0	1	1	1	1
7	104472276	Trim30d	missense_variant	E/K	Gag/Aag	0	0	0	0	0	0	1	1	0	1	1	1	1
7	113332732	Btbd10	missense_variant	E/D	gaG/gaC	0	0	0	0	0	0	1	1	1	1	1	1	1
7	116124812	Plekha7	missense_variant	I/V	Ata/Gta	0	0	0	0	0	0	1	1	1	1	1	1	1
7	116128673	Plekha7	missense_variant	L/P	cTg/cCg	0	0	0	0	0	0	1	0	1	1	1	1	1
7	116135985	Plekha7	missense_variant	S/C	tCc/tGc	0	0	0	0	0	0	1	1	1	1	1	1	1
7	116394334	Pik3c2a	stop_lost&NMD_transcript_variant	*/R	Tga/Cga	0	0	0	0	0	0	1	1	1	1	1	1	1
7	116418438	Pik3c2a	missense_variant	K/R	aAa/aGa	0	0	0	0	0	0	1	0	1	1	1	1	1
7	116527643	Nucb2	missense_variant	A/S	Gcg/Tcg	0	0	0	0	0	0	1	1	1	1	1	1	1
7	118152307	Smg1	missense_variant	L/V	Tta/Gta	0	0	0	0	0	0	1	1	1	1	1	1	1
7	118176871	Smg1	missense_variant	M/V	Atg/Gtg	0	0	0	0	0	0	1	1	1	1	1	1	1
7	118183819	Smg1	missense_variant	Q/H	caG/caC	0	0	0	0	0	0	1	1	1	1	1	1	1
7	118807020	Vps35l	missense_variant	T/M	aCg/aTg	0	0	0	0	0	0	1	1	1	1	1	1	1
7	118852449	Knop1	inframe_deletion	KR/R	AAGAgg/Agg	0	0	0	0	0	0	1	0	1	0.5	0.5	1	0.5
7	118853129	Knop1	missense_variant	I/M	atA/atG	0	0	0	0	0	0	1	1	1	1	1	1	1
7	122055616	Ears2	missense_variant	L/S	tTg/tCg	0	0	0	0	0	0	0	1	1	1	1	1	1
7	122133206	Dctn5	missense_variant&NMD_transcript_variant	R/C	Cgc/Tgc	0	0	0	0	0	0	1	0	1	1	1	1	1
7	122133251	Dctn5	missense_variant&NMD_transcript_variant	R/C	Cgt/Tgt	0	0	0	0	0	0	1	1	1	1	1	1	1
7	126413606	Cd19	missense_variant	A/D	gCc/gAc	0	0	0	0	0	0	1	1	1	1	1	1	1
7	126471236	Sh2b1	missense_variant	F/L	Ttc/Ctc	0	0	0	0	0	0	1	1	1	1	1	1	1
7	126701868	Coro1a	missense_variant	I/V	Atc/Gtc	0	0	0	0	0	0	1	1	1	1	1	1	1
7	128068678	Itgam	missense_variant	H/D	Cac/Gac	0	0	0	0	0	0	0	1	1	1	1	1	1
7	128084996	Itgam	missense_variant	S/A	Tcc/Gcc	0	0	0	0	0	0	0	1	1	1	1	1	1
7	128112386	Itgam	missense_variant	D/E	gaC/gaA	0	0	0	0	0	0	1	1	1	1	1	1	1
7	128271754	Slc5a2	missense_variant&NMD_transcript_variant	S/P	Tcg/Ccg	0	0	0	0	0	0	0	1	1	1	1	1	1
7	128272035	Slc5a2	missense_variant	S/P	Tca/Cca	0	0	0	0	0	0	1	1	1	1	1	1	1
7	128272084	Slc5a2	missense_variant	R/Q	cGg/cAg	0	0	0	0	0	0	0	1	1	1	1	1	1
7	128276393	BC017158	missense_variant	V/I	Gtc/Atc	0	0	0	0	0	0	0	1	1	1	1	1	1
7	128676787	Inpp5f	missense_variant	I/L	Att/Ctt	0	0	0	0	0	0	1	1	0	1	1	1	1
7	128694702	Inpp5f	missense_variant	P/S	Cct/Tct	0	0	0	0	0	0	0.5	1	0	1	1	1	1
7	128698488	Mcmbp	missense_variant	A/T	Gcc/Acc	0	0	0	0	0	0	1	1	1	1	1	1	1
7	128765475	Sec23ip	missense_variant	I/M	atA/atG	0	0	0	0	0	0	1	0	1	1	1	1	1
7	128765487	Sec23ip	missense_variant	Q/H	caG/caT	0	0	0	0	0	0	1	0	1	1	1	1	1
7	128772184	Sec23ip	missense_variant	A/E	gCa/gAa	0	0	0	0	0	0	1	1	1	1	1	1	1
7	129607765	Wdr11	missense_variant&NMD_transcript_variant	E/K	Gag/Aag	0	0	0	0	0	0	0	1	1	1	1	1	1
7	132981311	Zranb1	missense_variant&NMD_transcript_variant	V/M	Gtg/Atg	0	0	0	0	0	0	0	1	1	1	1	1	1
7	143557974	Cars	missense_variant	E/D	gaG/gaC	0	0	0	0	0	0	0	1	1	0.5	0.5	1	0.5
7	143559178	Cars	missense_variant	S/G	Agt/Ggt	0	0	0	0	0	0	0.5	1	1	0.5	0.5	1	0.5
Chromosome 8	Position	Gene	Type	AAChange	NTChange	sample_01	sample_02	sample_03	sample_04	sample_05	sample_06	sample_09	sample_10	sample_11	sample_13	sample_14	sample_16	sample_17
8	84662364	Ier2	missense_variant	G/S	Ggt/Agt	0	0	0	0	0	0	1	1	1	1	1	1	1
8	84662600	Ier2	missense_variant	K/T	aAg/aCg	0	0	0	0	0	0	1	1	1	1	1	1	1
8	84662616	Ier2	missense_variant	V/L	Gtc/Ctc	0	0	0	0	0	0	1	1	1	1	1	1	1
8	84689785	Trmt1	missense_variant	S/F	tCc/tTc	0	0	0	0	0	0	1	1	1	1	1	1	1
8	84689789	Trmt1	missense_variant	W/C	tgG/tgC	0	0	0	0	0	0	1	1	1	1	1	1	1
8	84690833	Trmt1	missense_variant	D/E	gaC/gaG	0	0	0	0	0	0	1	1	1	1	1	1	1
8	84699739	Trmt1	missense_variant	G/V	gGt/gTt	0	0	0	0	0	0	1	1	1	1	1	1	1
8	84702682	Lyl1	missense_variant	R/G	Aga/Gga	0	0	0	0	0	0	1	1	1	1	1	1	1
8	84702764	Lyl1	missense_variant	P/L	cCg/cTg	0	0	0	0	0	0	1	1	1	1	1	1	1
8	84704186	Lyl1	missense_variant	G/E	gGg/gAg	0	0	0	0	0	0	1	1	1	1	1	1	1
8	84832502	Gadd45gip1	missense_variant	P/L	cCc/cTc	0	0	0	0	0	0	1	1	1	1	1	1	1
8	84867407	Farsa	missense_variant	G/D	gGc/gAc	0	0	0	0	0	0	1	1	1	1	1	1	1
8	84892408	Gcdh	missense_variant	G/R	Gga/Cga	0	0	0	0	1	0	1	0	1	1	1	1	1
8	84960049	Rnaseh2a	missense_variant	H/R	cAc/cGc	0	0	0	0	0	0	1	1	1	1	1	1	1
8	85073404	Dhps	missense_variant	S/N	aGt/aAt	0	0	0	0	0	0	1	1	1	1	1	1	1
8	85090922	Man2b1	missense_variant	V/A	gTa/gCa	0	0	0	0	0	0	1	1	1	1	1	1	1
8	85097414	Man2b1	missense_variant	Y/F	tAc/tTc	0	0	0	0	0	0	1	1	1	1	1	1	1
8	85302832	Orc6	missense_variant	V/M	Gtg/Atg	0	0	0	0	0	0	1	1	1	1	1	1	1
8	85303366	Orc6	missense_variant	E/K	Gag/Aag	0	0	0	0	0	0	0	1	1	1	1	1	1
8	85305249	Orc6	missense_variant	A/T	Gca/Aca	0	0	0	0	0	0	1	1	1	1	1	1	1
8	85726177	Itfg1	missense_variant	S/P	Tct/Cct	0	0	0	0	0	0	1	1	1	1	1	1	1
8	88309765	Adcy7	missense_variant	A/V	gCa/gTa	0	0	0	0	0	0	1	1	1	1	1	1	1
8	88627695	Snx20	missense_variant	A/T	Gcg/Acg	0	0	0	0	0	0	1	1	1	1	1	1	1
8	88631775	Snx20	missense_variant	P/S	Cca/Tca	0	0	0	0	0	0	1	1	1	1	1	1	1
8	88664565	Nod2	missense_variant	G/V	gGc/gTc	0	0	0	0	0	0	0	1	1	1	1	1	1
8	88675481	Nod2	missense_variant	E/Q	Gaa/Caa	0	0	0	0	0	0	1	1	1	1	1	1	1
8	90932892	Chd9	missense_variant	P/H	cCt/cAt	0	0	0	0	0	0	0	1	1	1	1	1	1
8	90956419	Chd9	missense_variant	Y/H	Tac/Cac	0	0	0	0	0	0	0	1	1	1	1	1	1
8	90956684	Chd9	missense_variant	Y/C	tAt/tGt	0	0	0	0	0	0	1	0	1	1	1	1	1
8	91026833	Chd9	missense_variant	Y/F	tAc/tTc	0	0	0	0	0	0	1	1	1	1	1	1	1
8	91033792	Chd9	missense_variant	P/L	cCc/cTc	0	0	0	0	0	0	1	1	1	1	1	1	1
8	91041062	Chd9	missense_variant	P/S	Cca/Tca	0	0	0	0	0	0	1	1	1	1	1	1	1
8	91051370	Chd9	missense_variant	G/S	Ggc/Agc	0	0	0	0	0	0	1	1	1	1	1	1	1
8	91087144	Rbl2	missense_variant	D/G	gAc/gGc	0	0	0	0	0	0	1	1	1	1	1	1	1
8	91090167	Rbl2	missense_variant	T/S	aCc/aGc	0	0	0	0	0	0	1	1	1	1	1	1	1
8	91090175	Rbl2	missense_variant	S/T	Tcc/Acc	0	0	0	0	0	0	1	1	1	1	1	1	1
8	91090212	Rbl2	missense_variant	R/Q	cGg/cAg	0	0	0	0	1	0	1	1	1	1	1	1	1
8	91115244	Rbl2	missense_variant	A/S	Gcg/Tcg	0	0	0	0	0	0	1	1	1	1	1	1	1
8	91485199	Fto	missense_variant	N/S	aAt/aGt	0	0	0	0	0	0	1	1	1	1	1	1	1
8	91485276	Fto	missense_variant&splice_region_variant	M/V	Atg/Gtg	0	0	0	0	0	0	1	0	1	1	1	1	1
8	91666314	Fto	missense_variant	V/A	gTa/gCa	0	0	0	0	0	0	1	1	1	1	1	1	1
8	94390779	Herpud1	missense_variant	S/L	tCa/tTa	0	0	0	0	0	0	1	1	1	1	1	1	1
8	94395072	Herpud1	stop_gained	W/*	tgG/tgA	0	0	0	0	0	0	1	1	1	1	1	1	1
8	94473011	Nlrc5	missense_variant	L/F	ttG/ttC	0	0	0	0	0	0	1	1	0	1	1	1	1
8	94476738	Nlrc5	missense_variant	S/A	Tct/Gct	0	0	0	0	0	0	1	1	1	1	1	1	1
8	94476742	Nlrc5	missense_variant	F/S	tTt/tCt	0	0	0	0	0	0	1	1	1	1	1	1	1
8	94477006	Nlrc5	missense_variant	M/T	aTg/aCg	0	0	0	0	0	0	0	1	1	1	1	1	1
8	94477194	Nlrc5	missense_variant	R/C	Cgc/Tgc	0	0	0	0	0	0	1	1	1	1	1	1	1
8	94477211	Nlrc5	missense_variant	N/K	aaT/aaG	0	0	0	0	0	0	1	1	1	1	1	1	1
8	94854317	Coq9	missense_variant	D/N	Gac/Aac	0	0	0	0	0	0	1	1	1	1	1	1	1
8	121796965	Klhdc4	missense_variant	A/E	gCa/gAa	0	0	0	0	0	0	0.5	1	0.5	1	0	0.5	0.5
8	122892861	Ankrd11	missense_variant	D/E	gaT/gaA	0	0	0	0	0	0	0.5	1	0.5	1	0	0.5	0.5
8	123077894	Spg7	missense_variant	G/R	Gga/Aga	0	0	0	0	1	0	0.5	1	0.5	1	0	0.5	0.5
8	123080677	Spg7	missense_variant&NMD_transcript_variant	H/R	cAc/cGc	0	0	0	0	0	0	0.5	1	0.5	1	0	0.5	0.5
8	123398129	Tcf25	missense_variant	A/V	gCc/gTc	0	0	0	0	0	0	1	1	0.5	1	0	0.5	0.5
8	124733806	Arv1	splice_acceptor_variant			0	0	0	0	0	0	1	1	1	1	0	0.5	1
Chromosome 9	Position	Gene	Type	AAChange	NTChange	sample_01	sample_02	sample_03	sample_04	sample_05	sample_06	sample_09	sample_10	sample_11	sample_13	sample_14	sample_16	sample_17
9	25130622	Herpud2	missense_variant	V/L	Gtc/Ctc	0	0	0	0	0	0	1	1	0.5	1	1	1	1
9	36758812	Stt3a	missense_variant&NMD_transcript_variant	H/Y	Cat/Tat	0	0	0	0	0	0	0.5	0.5	0.5	1	0.5	0.5	0.5
9	41984435	Sorl1	splice_donor_variant			0	1	0	0	0	0	1	0	1	1	1	1	1
9	41984438	Sorl1	missense_variant&splice_region_variant	R/K	aGa/aAa	0	0	0	0	0	0	0.5	0.5	0.5	1	0.5	0.5	0.5
9	41989426	Sorl1	missense_variant	S/R	agT/agG	0	0	0	0	0	0	0.5	0.5	0.5	1	0.5	0.5	0.5
9	41996288	Sorl1	missense_variant	F/L	Ttc/Ctc	0	0	0	0	0	0	0.5	1	0	1	0.5	0.5	0.5
9	42000339	Sorl1	missense_variant	H/R	cAc/cGc	0	0	0	0	0	0	0.5	0.5	0.5	1	0.5	0.5	0.5
9	42099255	Sorl1	missense_variant	D/N	Gac/Aac	0	0	0	0	0	0	0.5	1	0	1	0.5	0.5	0.5
9	42971205	Arhgef12	missense_variant	A/T	Gct/Act	0	0	0	0	0	0	0.5	0	1	1	0.5	0.5	0.5
9	44332931	Dpagt1	missense_variant	I/T	aTa/aCa	0	0	0	0	0	0	1	1	1	1	0.5	0.5	0
9	44339498	Hmbs	missense_variant	H/N	Cac/Aac	0	0	0	0	0	0	0.5	0	0.5	1	0.5	0.5	0.5
9	44388073	Hyou1	missense_variant	P/L	cCg/cTg	0	0	0	0	0	0	0.5	0.5	0.5	1	0.5	0.5	0.5
9	44388141	Hyou1	missense_variant	D/N	Gac/Aac	0	0	0	0	0	0	0.5	0.5	0.5	1	0.5	0.5	0.5
9	44413146	Ccdc84	missense_variant	A/V	gCg/gTg	0	0	0	0	0	0	0	1	0.5	1	0.5	0.5	0.5
9	44607516	Ddx6	missense_variant	L/M	Ctg/Atg	0	0	0	0	0	0	0.5	0.5	0.5	1	0.5	0.5	0.5
9	44607532	Ddx6	inframe_deletion	NT/N	aaCACC/aaC	0	0	0	0	0	0	0	0.5	0.5	1	0.5	0.5	0.5
9	44782165	Ift46	missense_variant	D/E	gaC/gaA	0	0	0	0	0	0	1	1	0.5	1	0.5	0.5	0.5
9	44817773	Kmt2a	missense_variant	N/D	Aac/Gac	0	0	0	0	0	0	0.5	0.5	0	1	0.5	0.5	0.5
9	44822070	Kmt2a	missense_variant	S/P	Tct/Cct	0	0	0	0	1	0	0	1	0.5	1	0.5	0.5	0.5
9	45093848	Jaml	missense_variant	S/R	agC/agG	0	0	0	0	0	0	0	1	1	1	1	1	0.5
9	45256191	Il10ra	missense_variant	G/E	gGg/gAg	0	0	0	0	0	0	0	0.5	0.5	1	0.5	0.5	0.5
9	45265618	Il10ra	missense_variant	M/I	atG/atC	0	0	0	0	1	0	0.5	0.5	0.5	1	0.5	0.5	0.5
9	45265619	Il10ra	missense_variant	M/T	aTg/aCg	0	0	0	0	1	0	0.5	0.5	0.5	1	0.5	0.5	0.5
9	45266550	Il10ra	missense_variant	H/R	cAc/cGc	0	0	0	0	0	0	0.5	0.5	0.5	1	0.5	0.5	0.5
9	45266564	Il10ra	missense_variant&NMD_transcript_variant	P/L	cCc/cTc	0	0	0	0	0	0	1	1	0.5	1	0.5	0.5	0.5
9	45911098	Pcsk7	missense_variant&NMD_transcript_variant	V/A	gTt/gCt	0	0	0	0	0	0	0.5	0.5	0.5	1	0.5	0.5	0.5
9	45947048	Sidt2	missense_variant&NMD_transcript_variant	P/S	Ccg/Tcg	0	0	0	0	0	0	0	0.5	0.5	1	0.5	0.5	0.5
9	45947866	Sidt2	missense_variant	L/V	Ttg/Gtg	0	0	0	0	0	0	0.5	0	0.5	1	0.5	0.5	0.5
9	50636543	Dlat	missense_variant	A/V	gCt/gTt	0	0	0	0	0	0	0	1	1	1	0.5	0.5	0.5
9	53458931	Atm	missense_variant	I/L	Att/Ctt	0	0	0	0	0	0	0.5	0	0.5	1	0.5	0.5	0.5
9	56126644	Pstpip1	missense_variant	V/I	Gtc/Atc	0	0	0	0	0	0	0	0.5	0.5	1	0.5	0.5	0.5
9	57254009	1700017B05Rik	missense_variant	S/P	Tct/Cct	0	0	0	0	0	0	1	0	0.5	1	0.5	0.5	0.5
9	57257133	1700017B05Rik	missense_variant	T/P	Act/Cct	0	0	0	0	0	0	0	0.5	0.5	1	0.5	0.5	0.5
9	57833723	Arid3b	missense_variant	Q/K	Cag/Aag	0	0	0	0	0	0	1	0.5	0.5	1	0.5	0.5	0
9	57929714	Ubl7	missense_variant&splice_region_variant	I/S	aTc/aGc	0	0	0	0	0	0	1	0.5	0.5	1	0.5	0.5	0
9	71849844	Tcf12	missense_variant	N/S	aAc/aGc	0	0	0	0	0	0	1	0.5	0.5	0	0.5	0.5	1
9	79755552	Cox7a2	frameshift_variant	Q/QNX	caG/caGAACTA	0	0	0	0	0	0	0.5	0.5	0.5	0	0.5	0.5	1
9	80143686	Senp6	missense_variant	M/V	Atg/Gtg	0	0	0	0	0	0	0.5	0.5	0.5	0	0.5	0.5	1
9	90062721	Ctsh	missense_variant&NMD_transcript_variant	H/R	cAt/cGt	0	0	0	0	0	0	0.5	0.5	0.5	0	0.5	0.5	1
Chromosome 10	Position	Gene	Type	AAChange	NTChange	sample_01	sample_02	sample_03	sample_04	sample_05	sample_06	sample_09	sample_10	sample_11	sample_13	sample_14	sample_16	sample_17
10	62753200	Ccar1	frameshift_variant	D/DX	gaC/gaCA	0.5	0.5	0.5	0.5	0	0.5	0	0	0	0	0.5	0	0
Chromosome 11	Position	Gene	Type	AAChange	NTChange	sample_01	sample_02	sample_03	sample_04	sample_05	sample_06	sample_09	sample_10	sample_11	sample_13	sample_14	sample_16	sample_17
11	5105282	Rhbdd3	missense_variant	A/T	Gct/Act	0	0	0	1	0	0	1	1	1	1	1	0	1
11	46222615	Cyfip2	missense_variant	S/F	tCt/tTt	0	0	0	0	0	0	0.5	0.5	0.5	0.5	0	0.5	0.5
11	69834033	Nlgn2	missense_variant	N/D	Aac/Gac	0	1	0	0	0	0	1	1	1	1	1	1	1
Chromosome 13	Position	Gene	Type	AAChange	NTChange	sample_01	sample_02	sample_03	sample_04	sample_05	sample_06	sample_09	sample_10	sample_11	sample_13	sample_14	sample_16	sample_17
13	96483856	Polk	missense_variant	L/S	tTa/tCa	0	0	0	1	0	0	1	1	1	1	0.5	0.5	1
13	108052737	Ndufaf2	missense_variant	T/M	aCg/aTg	0	0	0	0	0	0	1	0	1	1	0.5	0.5	1
13	108052797	Ndufaf2	missense_variant	R/K	aGg/aAg	0	0	0	0	0	0	1	0	0.5	1	0.5	0.5	1
Chromosome 15	Position	Gene	Type	AAChange	NTChange	sample_01	sample_02	sample_03	sample_04	sample_05	sample_06	sample_09	sample_10	sample_11	sample_13	sample_14	sample_16	sample_17
15	97385132	Pced1b	missense_variant	D/N	Gat/Aat	0	0	0	1	0	0	1	1	1	1	1	1	1
15	97385132	Pced1b	missense_variant	D/N	Gat/Aat	0	0	0	1	0	0	1	1	1	1	1	1	1
15	97680450	Rpap3	missense_variant	M/T	aTg/aCg	0	0	0	0	0	1	1	1	1	1	1	1	1
15	97720737	Endou	missense_variant	E/K	Gag/Aag	0	0	0	0	0	0	1	1	1	1	1	1	1
15	100313199	Mettl7a1	missense_variant	R/Q	cGg/cAg	0	0	0	0	0	0	1	1	1	1	1	1	1
15	100409320	Slc11a2	missense_variant&NMD_transcript_variant	L/P	cTt/cCt	0	0	0	0	0	0	1	0	1	1	1	1	1
15	100475580	Letmd1	missense_variant	T/S	Acc/Tcc	0	0	0	0	0	1	1	1	1	1	1	1	1
15	101849089	Krt1	missense_variant	T/S	Aca/Tca	0	1	1	1	1	1	1	0	0	0	0	0	0
Chromosome 17	Position	Gene	Type	AAChange	NTChange	sample_01	sample_02	sample_03	sample_04	sample_05	sample_06	sample_09	sample_10	sample_11	sample_13	sample_14	sample_16	sample_17
17	27021018	Bak1	missense_variant	F/L	ttT/ttG	0	0	0	0	0	0	0.5	0	0.5	1	1	0.5	1
17	27089665	Itpr3	missense_variant&splice_region_variant	L/P	cTg/cCg	0	0	0	0	0	0	0.5	1	0.5	1	1	0.5	1
17	27564233	AI413582	missense_variant&NMD_transcript_variant	S/P	Tct/Cct	0	0	0	0	0	0	0.5	0.5	0.5	1	1	0.5	1
17	27876824	Uhrf1bp1	missense_variant&splice_region_variant	Q/R	cAg/cGg	0	0	0	0	0	0	0	1	1	1	1	1	1
17	28219802	Def6	missense_variant	K/E	Aag/Gag	0	0	0	0	0	0	0.5	0	0.5	1	1	0.5	1
17	29294080	BC004004	missense_variant&NMD_transcript_variant	V/A	gTg/gCg	0	0	0	0	0	0	0.5	0.5	0.5	1	1	0.5	1
17	29363761	Fgd2	missense_variant	S/I	aGc/aTc	0	0	0	0	0.5	0	0.5	0.5	0.5	1	1	0.5	1
17	29378336	Fgd2	missense_variant	E/D	gaG/gaC	0	0	0	0	0	0	0.5	0.5	0.5	1	1	0.5	1
17	33335363	Zfp81	missense_variant	N/S	aAt/aGt	0	0	0	0	0	0	1	1	0	1	1	1	1
17	33335550	Zfp81	missense_variant	G/R	Gga/Aga	0	0	0	0	0	0	1	1	1	0	1	1	1
17	35656773	Vars2	missense_variant	R/Q	cGg/cAg	0	0	0	0	0	0	0	1	1	1	1	1	1
17	35656991	Vars2	missense_variant	T/A	Acc/Gcc	0	0	0	0	0	0	1	1	1	1	1	1	1
17	35661585	Vars2	missense_variant	L/R	cTa/cGa	0	0	0	0	0	0	1	1	1	1	1	1	1
17	35665880	Vars2	missense_variant	M/V	Atg/Gtg	0	0	0	0	0	0	1	1	1	1	1	1	1
17	35670914	Gtf2h4	missense_variant&NMD_transcript_variant	M/T	aTg/aCg	0	0	0	0	0	0	1	1	1	1	1	1	1
17	35895748	2310061I04Rik	missense_variant	S/P	Tct/Cct	0	0	0	0	0	0	1	1	1	1	1	1	1
17	35895954	2310061I04Rik	missense_variant	H/R	cAt/cGt	0	0	0	0	0	0	1	1	1	1	1	1	1
17	35898265	Atat1	missense_variant	G/R	Gga/Aga	0	0	0	0	0	0	1	1	1	1	1	1	1
17	36119331	H2-T10	missense_variant	E/D	gaA/gaT	0	0	0	0	0	0	0.5	0.5	0.5	0.5	0.5	0.5	0.5
17	36120233	H2-T10	missense_variant	L/V	Ctg/Gtg	0	0	0	0	1	0	0.5	0.5	0.5	0.5	0.5	0.5	0.5
17	36120405	H2-T10	missense_variant	G/D	gGc/gAc	0	0	0	0	0	0	1	0.5	0.5	0.5	0.5	0.5	0.5
17	36120692	H2-T10	missense_variant	R/H	cGt/cAt	0	0	0	0	0	0	0.5	0.5	0.5	0.5	0.5	0.5	0.5
17	36120801	H2-T10	missense_variant	G/R	Ggc/Cgc	0	0	0	0	0	0	0	1	1	1	1	1	1
17	36168136	Gm8909	missense_variant	W/R	Tgg/Cgg	0	0	0	0	0	0	0	1	1	1	1	1	1
17	36256002	Rpp21	stop_gained	R/*	Cga/Tga	0	0	0	0	0	0	1	1	1	1	1	1	1
17	36269031	Trim39	missense_variant	T/A	Acc/Gcc	0	0	0	0	0	0	0	1	1	1	1	1	1
17	36949381	Ppp1r11	missense_variant	K/Q	Aag/Cag	0	0	0	0	0	0	1	1	1	1	1	1	1
17	37272377	H2-M3	missense_variant	K/R	aAg/aGg	0	0	0	0	0	0	1	1	1	1	1	1	1
17	37272666	H2-M3	missense_variant	S/Y	tCt/tAt	0	0	0	0	0	0	1	1	1	1	1	1	1
17	37272716	H2-M3	missense_variant	I/L	Atc/Ctc	0	0	0	0	0	0	1	1	1	1	1	1	1
17	37280328	Olfr99	missense_variant	I/L	Atc/Ctc	0	0	0	0	0	0	1	1	1	1	1	1	1
17	40931741	Cenpq	missense_variant	V/I	Gta/Ata	0	0	0	0	0	0	1	1	1	1	1	1	1
17	40931756	Cenpq	missense_variant	V/I	Gtt/Att	0	0	0	0	0	0	1	1	1	1	1	1	1
17	40933137	Cenpq	missense_variant	V/L	Gtg/Ctg	0	0	0	0	0	0	1	1	1	1	1	1	1
17	42805235	Cd2ap	missense_variant	R/K	aGa/aAa	0	0	0	0	0	0	1	1	1	1	1	1	1
17	43680237	Cyp39a1	missense_variant	L/F	Ctt/Ttt	0	0	0	0	0	0	1	1	1	1	1	1	1
17	43680245	Cyp39a1	missense_variant	E/D	gaG/gaT	0	0	0	0	0	0	1	1	1	1	1	1	1
17	46152786	Mad2l1bp	missense_variant	V/A	gTt/gCt	0	0	0	0	0	0	1	1	0.5	1	1	0.5	1
17	46194376	Polh	missense_variant	Y/H	Tat/Cat	0	0	0	0	0	0	1	1	0.5	1	1	0	1
17	46204691	Xpo5	missense_variant	V/I	Gtt/Att	0	0	0	0	0	0	1	1	1	1	1	0.5	1
17	46207906	Xpo5	missense_variant	F/S	tTc/tCc	0	0	0	0	0	0	0	1	1	1	1	0.5	1
17	46251667	Yipf3	missense_variant	I/V	Atc/Gtc	0	0	0	0	0	0	0	1	0.5	1	1	0.5	1
17	46259393	Tjap1	missense_variant	S/A	Tcc/Gcc	0	0	0	0	0	0	1	1	0.5	1	1	0.5	1
17	46538527	Cul9	missense_variant	C/Y	tGc/tAc	0	0	0	0	0	0	0	1	0.5	1	1	1	1
17	46677765	Klhdc3	missense_variant	A/T	Gca/Aca	0	0	0	0	0	0	0	1	0.5	1	1	0.5	1
17	46721746	Pex6	missense_variant	R/H	cGc/cAc	0	0	0	0	0	0	0.5	1	0.5	1	1	0.5	1
17	46747180	Cnpy3	missense_variant	V/D	gTc/gAc	0	0	0	0	0	0	0	1	1	1	1	0.5	1
17	47372463	Mrps10	missense_variant	R/G	Agg/Ggg	0	0	0	0	0	0	1	1	0.5	1	1	0	1
17	47578763	Ccnd3	missense_variant	M/T	aTg/aCg	0	0	0	0	0	0	0.5	1	0.5	1	1	0.5	1
Chromosome 19	Position	Gene	Type	AAChange	NTChange	sample_01	sample_02	sample_03	sample_04	sample_05	sample_06	sample_09	sample_10	sample_11	sample_13	sample_14	sample_16	sample_17
19	17329276	Gcnt1	missense_variant	H/D	Cat/Gat	0	0	0	0	0	0	1	0	1	1	1	0.5	0.5
19	17329647	Gcnt1	missense_variant	G/A	gGg/gCg	0	0	0	0	0	0	1	0	1	1	1	0.5	0.5
19	17330098	Gcnt1	missense_variant	R/W	Cgg/Tgg	0	0	0	0	0	0	1	1	1	1	0.5	0.5	0.5
19	26651707	Smarca2	missense_variant	R/S	agA/agC	0	0	0	0	0	0	0	1	1	1	1	0.5	0.5
